# Supplementary material for: Characteristics and outcomes of COVID-19 associated stroke: a UK multicentre case-control study
Source: HighWire-hosted journal article supplement (doi:10.1136/jnnp-2020-324927), 2020-11-05
Supplement: jnnp-2020-324927supp001_data_supplement.pdf [file jnnp-2020-324927supp001_data_supplement.pdf]

## Characteristics and outcomes of COVID-19 associated stroke: a UK multicentre case-control study. Perry *et al.* (2020)

### Supplemental materials

#### INDEX

| Content              | Page |
|----------------------|------|
| Supplemental figures | 1    |
| Supplemental tables  | 3    |
| Collaborators        | 5    |

#### SUPPLEMENTAL FIGURES

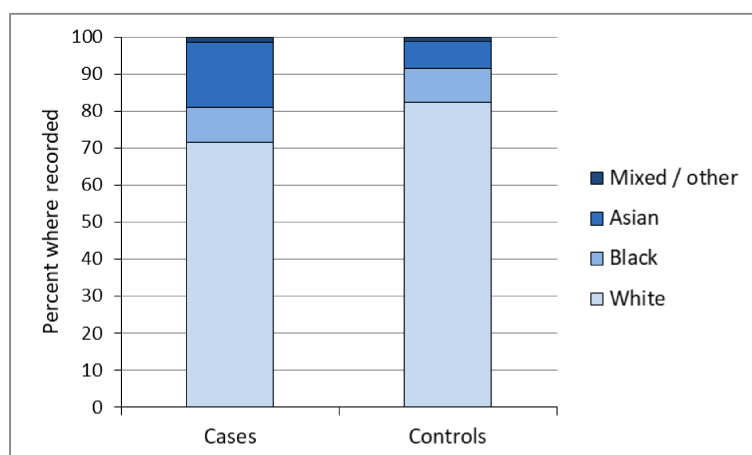

**Figure S1** Ethnicity in cases and controls, including all strokes (ischaemic and haemorrhagic). Among patients presenting with stroke, the proportion (%) of patients in each ethnicity category is shown separately for cases (with evidence of COVID-19 at the onset of their stroke according to the definition given in the Methods section) compared with controls (negative on testing and/or in whom no evidence of COVID-19 was ever found). Only patients in whom ethnicity was recorded (86.0% of cases patients and 77.7% of controls) have been included.

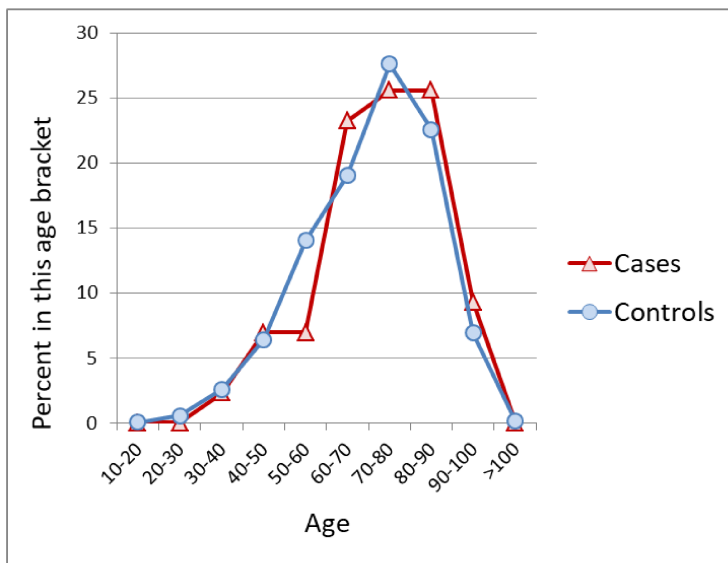

**Figure S2** Age distributions in cases (who had evidence of COVID-19 at the onset of their stroke, red triangles) and in controls (who were SARS-CoV-2-negative on testing or never had evidence of COVID-19 infection, blue circles), including all strokes (ischaemic and haemorrhagic). The age distributions overlap very closely with no evidence of a sub-group of younger patients in cases.

## SUPPLEMENTAL TABLES

| <b>Table S1.</b> Cases submitted by each stroke service. |                      |                     |              |                 |                         |
|----------------------------------------------------------|----------------------|---------------------|--------------|-----------------|-------------------------|
|                                                          | <b>Total strokes</b> | <b>All COVID-19</b> | <b>Cases</b> | <b>Controls</b> | <b>Weeks collected*</b> |
| <b>Birmingham</b>                                        | 105                  | 12                  | 11           | 93              | 1-8                     |
| <b>Fairfield, Greater Manchester</b>                     | 232                  | 26                  | 5            | 206             | 2-17                    |
| <b>Glasgow Royal Infirmary</b>                           | 43                   | 3                   | 3            | 40              | 1-4, 11-12              |
| <b>Imperial</b>                                          | 38                   | 9                   | 9            | 29              | 3-4, 7, 11-12           |
| <b>King's, London</b>                                    | 161                  | 5                   | 5            | 156             | 3-17                    |
| <b>Leeds</b>                                             | 78                   | 7                   | 6            | 71              | 4-10, 12                |
| <b>Newcastle</b>                                         | 120                  | 10                  | 8            | 110             | 1-8                     |
| <b>Princess Royal, Bromley</b>                           | 78                   | 1                   | 1            | 77              | 2-5, 7-16               |
| <b>Salford, Greater Manchester</b>                       | 119                  | 6                   | 6            | 113             | 2-9                     |
| <b>Southampton</b>                                       | 64                   | 8                   | 4            | 56              | 1-7                     |
| <b>St George's, London</b>                               | 55                   | 6                   | 6            | 49              | 1, 5, 8                 |
| <b>Stoke-on-Trent</b>                                    | 97                   | 12                  | 6            | 85              | 1-9                     |
| <b>UCL Hospitals, London</b>                             | 317                  | 18                  | 16           | 299             | 1-17                    |
| <b>Total</b>                                             | <b>1507</b>          | <b>123</b>          | <b>86</b>    | <b>1384</b>     |                         |

\*Patients were included in the study if they were admitted during the 17 weeks following Monday 9 March, the date of the first case (i.e. patient with evidence of COVID-19 at stroke onset). These weeks are labelled consecutively from 1 to 17. Collection finished at the end of Week 17, i.e. week commencing Monday 29 June and ending 5 July. Each stroke service collected patients with dates of admission during the weeks shown.

**Table S2** Stroke characteristics in 36 patients with post-stroke COVID-19 (patients who appear to have developed COVID-19 after stroke onset), shown alongside the data from cases and controls from Table 1 for ease of comparison.

|                                                 | Cases        | Controls    | Post-stroke COVID-19 |
|-------------------------------------------------|--------------|-------------|----------------------|
| <b>All strokes (n)</b>                          | 86           | 1384        | 36*                  |
| Age (years) (median (IQR))                      | 74.5 (67-84) | 73 (61-82)  | 75 (65.8-80.3)       |
| Males (n (%))                                   | 47 (54.7)    | 731 (52.8)  | 18 (50)              |
| Ischaemic (n (%))                               | 81 (94.2)    | 1193 (86.2) | 30 (83.3)            |
| <b>Ethnicity (n)</b>                            | 74           | 1076        | 35                   |
| White (n (%))                                   | 53 (71.6)    | 886 (82.3)  | 32 (91.4)            |
| Black (n (%))                                   | 7 (9.5)      | 98 (9.1)    | 2 (5.7)              |
| Asian (n (%))                                   | 13 (17.6)    | 79 (7.3)    | 1 (2.9)              |
| Mixed / other (n (%))                           | 1 (1.4)      | 13 (1.2)    | 0 (0.0)              |
| <b>Disability prior to stroke (n)</b>           | 84           | 1369        | 36                   |
| Premorbid mRS (median (IQR))                    | 1 (0-3)      | 0 (0-2)     | 1.5 (0-2.3)          |
| <b>Admission stroke severity (n)</b>            | 74           | 1336        | 36                   |
| NIHSS (median (IQR))                            | 8 (3.25-17)  | 5 (2-13)    | 14.5 (5.8-18)        |
| <b>Respiratory support during admission (n)</b> | 86           | 1370        | 36                   |
| None required (n (%))                           | 41 (47.7)    | 1236 (90.2) | 23 (63.9)            |
| O <sub>2</sub> by nasal prongs (n (%))          | 22 (25.6)    | 66 (4.8)    | 8 (22.2)             |
| O <sub>2</sub> by mask (n (%))                  | 15 (17.4)    | 42 (3.1)    | 4 (11.1)             |
| Non-invasive ventilation (n (%))                | 1 (1.2)      | 6 (0.4)     | 0 (0)                |
| Intubation and ventilation (n (%))              | 7 (8.1)      | 20 (1.5)    | 1 (2.8)              |
| <b>Outcome measures (n)</b>                     | 86           | 1384        | 36                   |
| Length of stay in days (median (IQR))           | 7 (3-17)     | 3 (2-8)     | 27.5 (14.8-47.3)     |
| mRS on discharge (median (IQR))                 | 4 (2-5)      | 3 (1-4)     | 4 (2-4)              |
| Death during admission (n (%))                  | 17 (19.8)    | 133 (9.6)   | 3 (8.3)              |
| Recurrence during admission (n (%))             | 2 (2.3)      | 14 (1.0)    | 0 (0.0)              |

\*One intracerebral haemorrhage in a patient diagnosed with COVID-19 is omitted: the patient could not be classified as a case or as having post-stroke COVID-19 as the date of stroke onset could not be estimated. NIHSS, National Institutes of Health Stroke Scale; mRS, modified Rankin scale.

## **COLLABORATORS**

### **Birmingham**

Amy Hoare, Laura Standing.

### **Fairfield, Greater Manchester**

Shabaz Aiaz, Bimal Chakraborty, Ben Debbage, Marwa Eltemamy, Natalie Greaves, Erica Greenhalgh, Sabbiha Nadia Majumder, Surojit Sen.

### **Glasgow Royal Infirmary**

Anna Fleck, Thomas French, Sinead Oxley.

### **Imperial, London**

Madison Brown.

### **King's College Hospital and Princess Royal Hospital, London**

John Aeron-Thomas, Fong Chan, Elliott Smith, Con Tibajia, Maria Garcia Pardo.

### **Leeds**

Nathan Douglas, Linetty Makawa, Emelda Veraque, Dean Waugh.

### **Newcastle**

Beth Atkinson, Eleanor Cameron, Stephen Woodward, Michelle Fawcett.

### **Salford Royal Hospital, Greater Manchester**

Sarah Heathcote, Neil Holden.

### **Southampton**

Fern Fox, Mariana Ferreira, Stacey Valentine.

### **Stoke-on-Trent**

Rachel Gunston.

### **St George's, London**

Lauren Binnie, Gillian Cluckie, Rita Ghatala, Kate Kennedy, Sarah Trippier, Cai Hua Sim, Rebecca Williams.

### **UCL Hospitals London**

Cyrille Cahoy, Lucinda Crook, Nina Francia, Florence Mantey, Marilena Marinescu, Sabaa Obarey, Sifelani Tshuma.

### **Case report form implementation**

Madeleine Perry.

### **Data cleaning**

Suzanna Perry.
